# Supplementary material for: Optimization of the thermoelectric performance of layer-by-layer structured copper-phthalocyanine (CuPc) thin films doped with hexacyano-trimethylene-cyclopropane (CN6-CP)
Source: Royal Society of Chemistry journal article supplement (doi:10.1039/c9ra06381a), 2019-01-01
Supplement: c9ra06381a1.pdf [file c9ra06381a1.pdf]

## Supporting

### Optimization of the Thermoelectric Performance of Layer-by-Layer Structured Copper-Phthalocyanine (CuPc) Thin Films Doped with Hexacyano-Trimethylene-Cyclopropane (CN6-CP)

Weilong Xing<sup>a,b</sup>, Jie Chen<sup>a,b</sup>, Yingying Liang<sup>a,b</sup>, Ye Zou<sup>a</sup>, Yimeng Sun<sup>a</sup>, Wei Xu<sup>a,b\*</sup>, Daoben Zhu<sup>a,b\*</sup>

<sup>a</sup> Beijing National Laboratory for Molecular Sciences, Key Laboratory of Organic Solids, Institute of Chemistry, Chinese Academy of Sciences, Beijing, 100190, China

<sup>b</sup> University of Chinese Academy of Sciences, Beijing, 100049, China

\* Corresponding author.

Email addresses: [wxu@iccas.ac.cn](mailto:wxu@iccas.ac.cn) (W. Xu), [zhudb@iccas.ac.cn](mailto:zhudb@iccas.ac.cn) (D.B. Zhu)

**Table. S1.** A comparison of electrical conductivity of two different structure of devices, bilayer and multilayer.

| The thick of each CuPc layer/nm | The thick of each CN6-CP layer/nm | Repeat times | The total thickness/nm | $\sigma_{\max}$ (S/cm) |
|---------------------------------|-----------------------------------|--------------|------------------------|------------------------|
| 40                              | 8                                 | 1            | 48                     | 0.002                  |
| 10                              | 2                                 | 4            | 48                     | 0.12                   |
| 2                               | 0.4                               | 20           | 48                     | 0.30                   |

**Table. S2.** Comparing of the electrical conductivity of CuPc films doped by CN6-CP by layer-by-layer-evaporation with the substrates treated with five different self-assembled monolayers (SAM).

| SAM                                                 | $\sigma_{\max}$ (S/cm) |
|-----------------------------------------------------|------------------------|
| Bare                                                | 0.30                   |
| OTS (octadecyltrichlorosilane)                      | 0.50                   |
| ((1H,1H,2H,2H-Heptadecafluorodecyl)trichlorosilane) | 0.35                   |
| Octadecylphosphonic acid                            | 0.28                   |
| HexaMethyldisilazane                                | 0.30                   |
| poly(amic acid)                                     | 0.25                   |

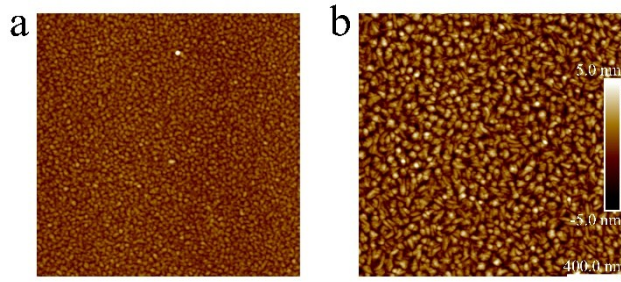

**Fig. S1.** The AFM images of pristine CuPc films on bare glass substrate and OTS-modified glass substrate. (a) glass substrate, (b) OTS-modified glass substrate.

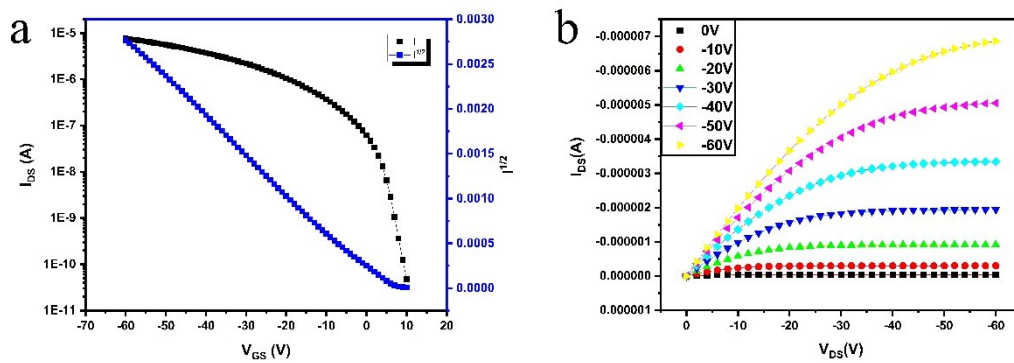

**Fig. S2.** The OFET performance of pristine CuPc films. (a) the transfer curves of 10nm CuPc (

$$I_{DS} = \frac{W}{2L} \mu C_i (V_{GS} - V_{th})^2$$

(c) the output curves of the same device.

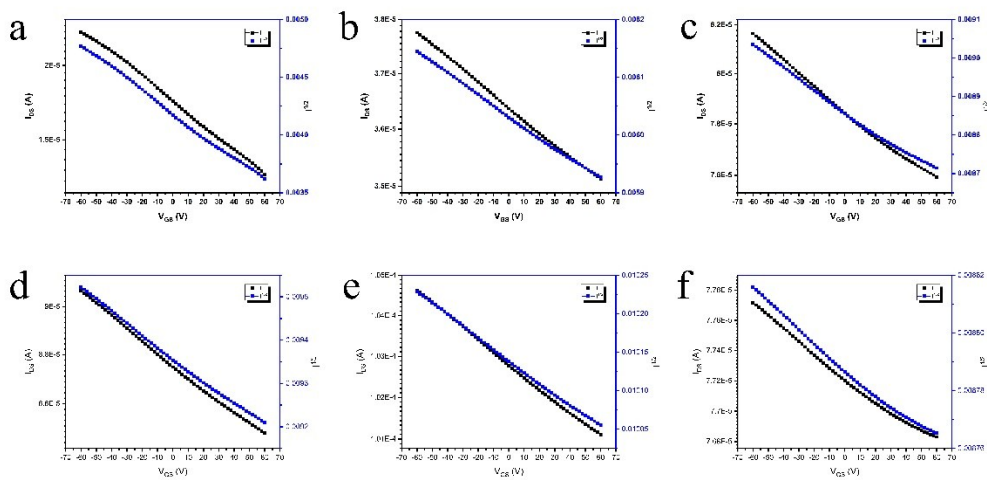

**Fig. S3.** The transfer curves of 10nm CuPc thin films with different doping concentration (

$I_{DS} = W/L\mu C_i(V_{GS} - V_{th})V_{DS}$ . (a) MR= 14%, (b) MR=24%, (c) MR=27%, (d) MR=30%, (e) MR=34%, (f) MR=52%

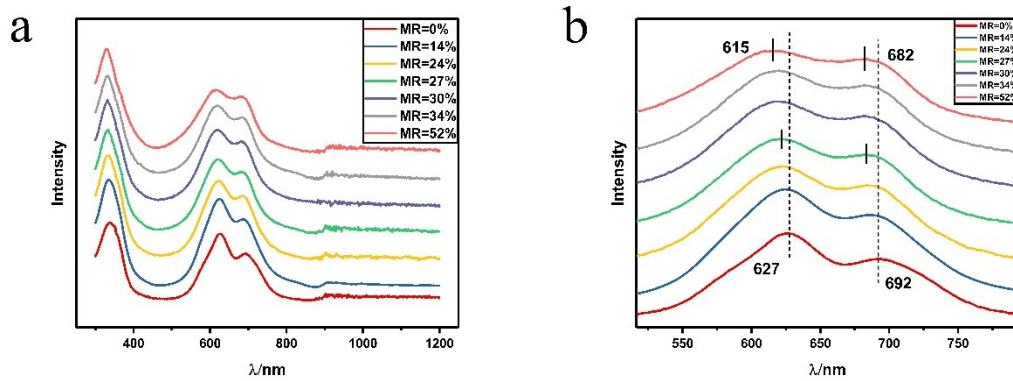

**Fig. S4.** UV-vis absorption of pristine and doped CuPc films in different molar ratios (a) 300-1200 nm; (b) 500-800 nm

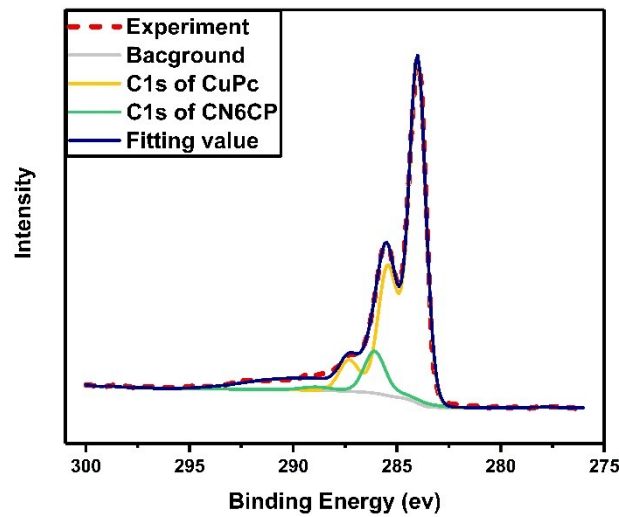

**Fig. S5.** The XPS spectra of C1s of CuPc/CN6-CP film. The red short dashed line represents the experimental data. The gray line represents the background. The yellow and green line represent the C1s of CuPc and CN6-CP respectively. The purple line represents the fitting curve.

**Table. S3.** The value of molar ratio, calculated from the Fig. S5.

| Sample No.                                   | 1   | 2     | 3     | 4     | 5     | 6     | 7     |
|----------------------------------------------|-----|-------|-------|-------|-------|-------|-------|
| Monolayer thickness of CN6-CP ( $T_D$ ) (nm) | 0   | 0.1   | 0.2   | 0.3   | 0.4   | 0.5   | 0.8   |
| C1s of CuPc (%)                              | 100 | 94.99 | 91.77 | 90.93 | 89.74 | 88.65 | 83.74 |
| C1s of CN6-CP (%)                            | 0   | 5.01  | 8.23  | 9.07  | 10.26 | 11.35 | 16.26 |
| Molar ratio (MR) (%)                         | 0   | 14    | 24    | 27    | 30    | 34    | 52    |

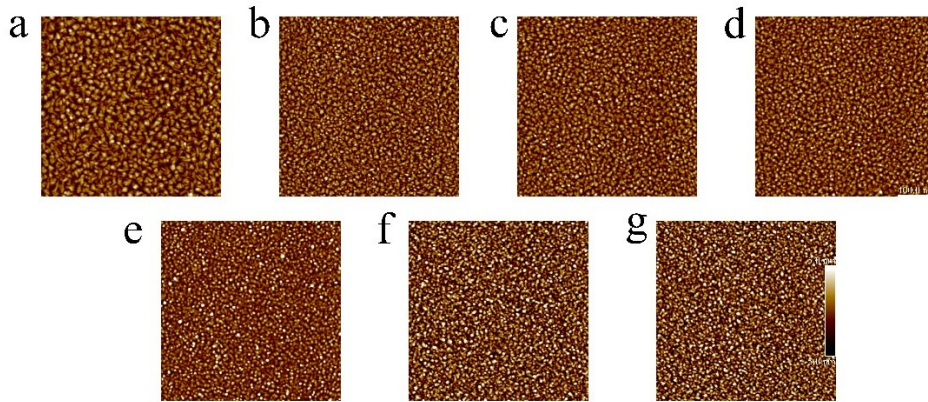

**Fig. S6.** The AFM images of CuPc films with different doping concentration deposited on OTS-modified substrate. (a) MR=0%, (b) MR= 14%, (c) MR=24%, (d) MR=27%, (e) MR=30%, (f) MR=34%, (g) MR=52%
